# Supplementary material for: PAR2 controls cholesterol homeostasis and lipid metabolism in nonalcoholic fatty liver disease
Source: PubMed Central journal article supplement — Mol Metab. 2019 Aug 28;29:99–113. doi: 10.1016/j.molmet.2019.08.019 (PMC6742970; doi:10.1016/j.molmet.2019.08.019), 2019-08-28
Supplement: mmc1.pdf [file mmc1.pdf]

## Supplemental Material

### **PAR2 controls cholesterol homeostasis and lipid metabolism in nonalcoholic fatty liver disease**

Rajashree Rana<sup>1</sup>, Andrew M. Shearer<sup>1,2</sup>, Elizabeth K. Fletcher<sup>1</sup>, Nga Nguyen<sup>1</sup>, Srijoy Guha<sup>1</sup>, Daniel H. Cox<sup>2</sup>, Manal Abdelmalek<sup>3</sup>, Ying Wang<sup>3</sup>, James D. Baleja<sup>2</sup>, Lidija Covic<sup>1,2</sup>, Athan Kuliopulos<sup>1,2,\*</sup>

#### **Author affiliations**

<sup>1</sup>Center for Hemostasis and Thrombosis Research, 800 Washington St, Tufts Medical Center, Boston, MA 02111, USA

<sup>2</sup>Tufts University School of Graduate Biomedical Sciences, Tufts University School of Medicine, Boston, MA 02111, USA

<sup>3</sup>Division of Gastroenterology and Hepatology, Duke University Medical Center, Durham, NC 27710, USA

\*Corresponding author. Center for Hemostasis and Thrombosis Research, 800 Washington St, Tufts Medical Center, Boston, MA 02111, USA; E-mail: [athan.kuliopulos@tufts.edu](mailto:athan.kuliopulos@tufts.edu)

**Table S1.** Median (25%, 75%) of laboratory values of NAFLD subjects from Fib 0-2 versus Fib 3-4 cohorts.

| <b>Characteristic</b>    | <b>Fib 0-2<br/>(n=50)</b> | <b>Fib 3-4<br/>(n=43)</b> | <b>P value<sup>a</sup></b> |
|--------------------------|---------------------------|---------------------------|----------------------------|
| Total Cholesterol, mg/dL | 178 (145, 217)            | 183 (153,234)             | 0.59                       |
| LDL Cholesterol, mg/dL   | 109 (83, 132)             | 106 (80, 136)             | 0.92                       |
| HDL Cholesterol, mg/dL   | 38 (32, 50)               | 35 (27, 43)               | 0.026                      |
| Triglycerides, mg/dL     | 152 (112, 230)            | 168 (105, 236)            | 0.26                       |
| ALT                      | 57 (30,89)                | 75 (47, 107)              | 0.35                       |
| AST                      | 38 (26, 66)               | 62 (46, 96)               | 0.0005                     |

<sup>a</sup>P value from non-parametric Pearson's chi-squared test of median plasma values (Mood's test) from NAFLD/NASH subjects with either Fib 0-2 or Fib 3-4 score in their liver biopsies.

**Table S2.** Median (25%, 75%) of laboratory values of NAFLD subjects from low hepatic PAR2 versus high hepatic PAR2-expressing cohorts.

| <b>Characteristic</b>      | <b>Low Hepatic<br/>PAR2<br/>Expression<br/>(n=42)</b> | <b>High Hepatic<br/>PAR2<br/>Expression<br/>(n=51)</b> | <b>P value<sup>a</sup></b> |
|----------------------------|-------------------------------------------------------|--------------------------------------------------------|----------------------------|
| Total Cholesterol, mg/dL   | 172 (145, 209)                                        | 185 (154,232)                                          | 0.26                       |
| LDL Cholesterol, mg/dL     | 95 (79, 131)                                          | 116 (87, 144)                                          | 0.049                      |
| HDL Cholesterol, mg/dL     | 38 (30, 50)                                           | 35 (30, 44)                                            | 0.98                       |
| Triglycerides, mg/dL       | 158 (102, 236)                                        | 156 (113, 195)                                         | 0.75                       |
| ALT                        | 59 (33,94)                                            | 74 (41, 94)                                            | 0.29                       |
| AST                        | 43 (26, 76)                                           | 50 (38, 80)                                            | 0.59                       |
| Male (% of total subjects) | 40 (17M, 25F)                                         | 47 (24M, 27F)                                          | 0.54 <sup>b</sup>          |

<sup>a</sup>P value from non-parametric Pearson's chi-squared test of median plasma values (Mood's test) from NAFLD/NASH subjects with either low or high PAR2 expression in their liver biopsies.

<sup>b</sup>P value from Fisher's exact test using number of males (M) versus females (F).

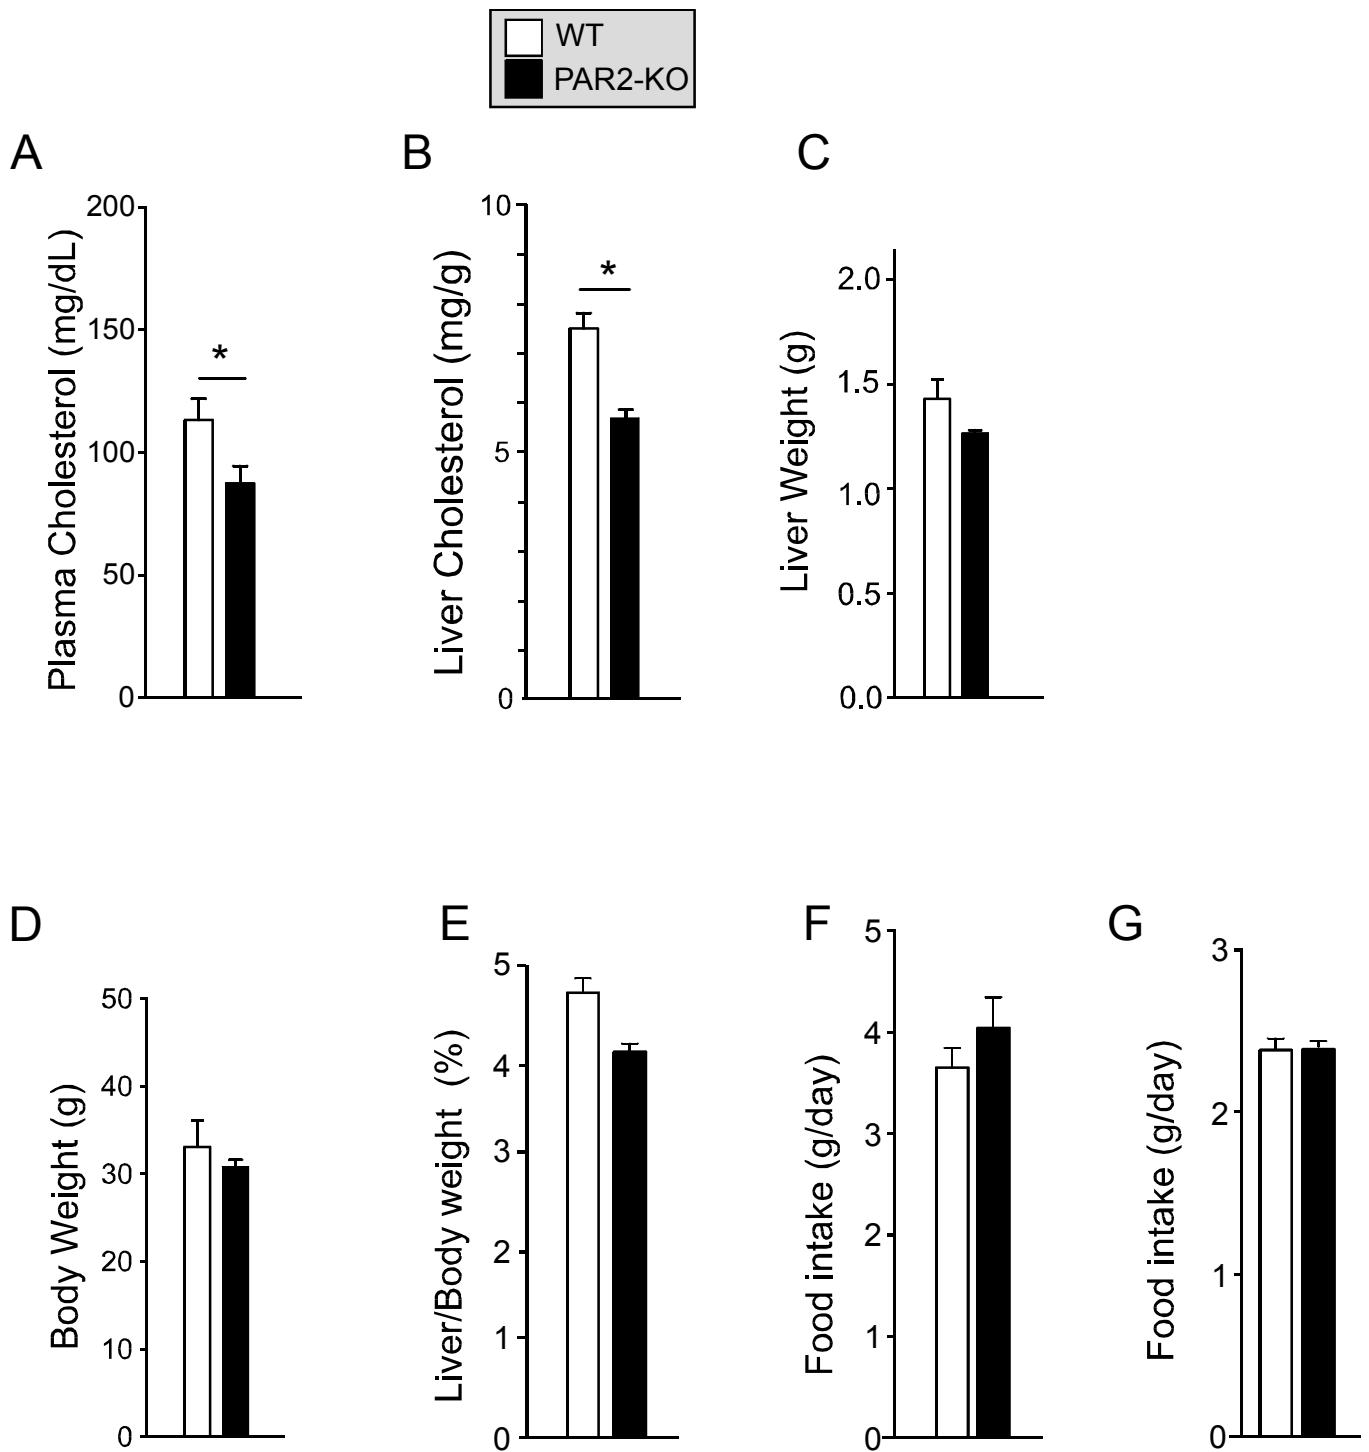

**Figure S1.** PAR2 deficiency suppresses cholesterol levels in plasma and liver in mice fed a normal diet. Male C57BL/6 wild type (WT-open bars) and PAR2-KO (KO-black bars) mice were fed a normal chow diet (n=5-7) for 16 weeks. (A) At the 16 week endpoint, plasma was obtained from non-fasted mice at Z+4 time point and assayed for total cholesterol. (B) Livers from mice in A were harvested and weighed at the 16 week endpoint and assayed for mg cholesterol per g of liver tissue. (C-F) Liver and body weight was measured at the 16 week endpoint. Mean daily food consumption per mouse was assessed over 16 weeks for (F) normal diet and (G) high-fat diet. \*P<0.05 by 2-tailed t-test.

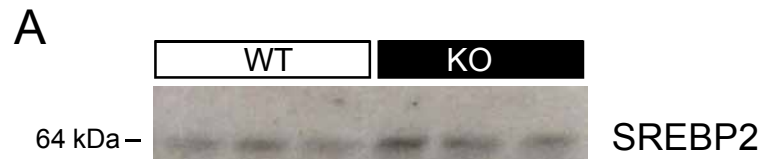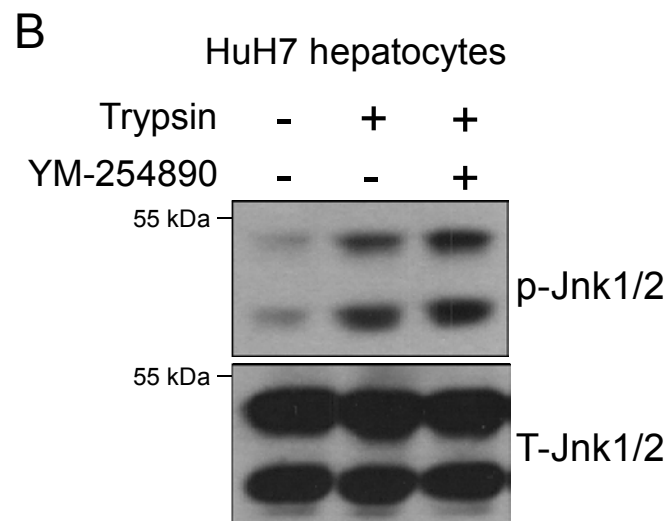

**Figure S2.** (A) Western blots of liver lysates from WT and PAR2-KO mice fed high fat diet (HFD) for 16 weeks of active 64 kDa proteolytic fragment of SREBP2. (B) The PAR2 agonist, trypsin (10 nM), induces phospho-Jnk1/2 signaling (15 min) in HuH7 hepatocyte lysates which is not affected by the Gq inhibitor, YM-254890 (100 nM), as shown by western blot for phospho (p)-Jnk1/2 and total (T) Jnk1/2.
